# Supplementary material
Source: Research Square preprint supplement (doi:10.21203/rs.3.rs-9600220/v1)
Supplement: Supplementary file 1 [file eaa12d1f415c017ed6e7ff28.doc]

**Supporting Information for**

**Pilot-Scale Green Hydrogen Production via Concentrated Natural Sunlight-Driven Photocatalytic Overall Water Splitting and Photothermal Synergy**

*Yang Wang**, *Dongping Duan**, *Xiaodong Zhang*, *Qibo Jia*, *Xi Chen*, *Li Zhong*, *Yan Li*, *Ke Gan*, *E Zhou*, *Yan Liu*, *Yuhan Liu*, *Renlong Song*, *Yizhao Yang*, *Xinyu Wu*

**Corresponding Author:** Yang Wang, [wangyang6270@ipe.ac.cn;](mailto:wangyang6270@ipe.ac.cn;) Dongping Duan, douglass@ipe.ac.cn.


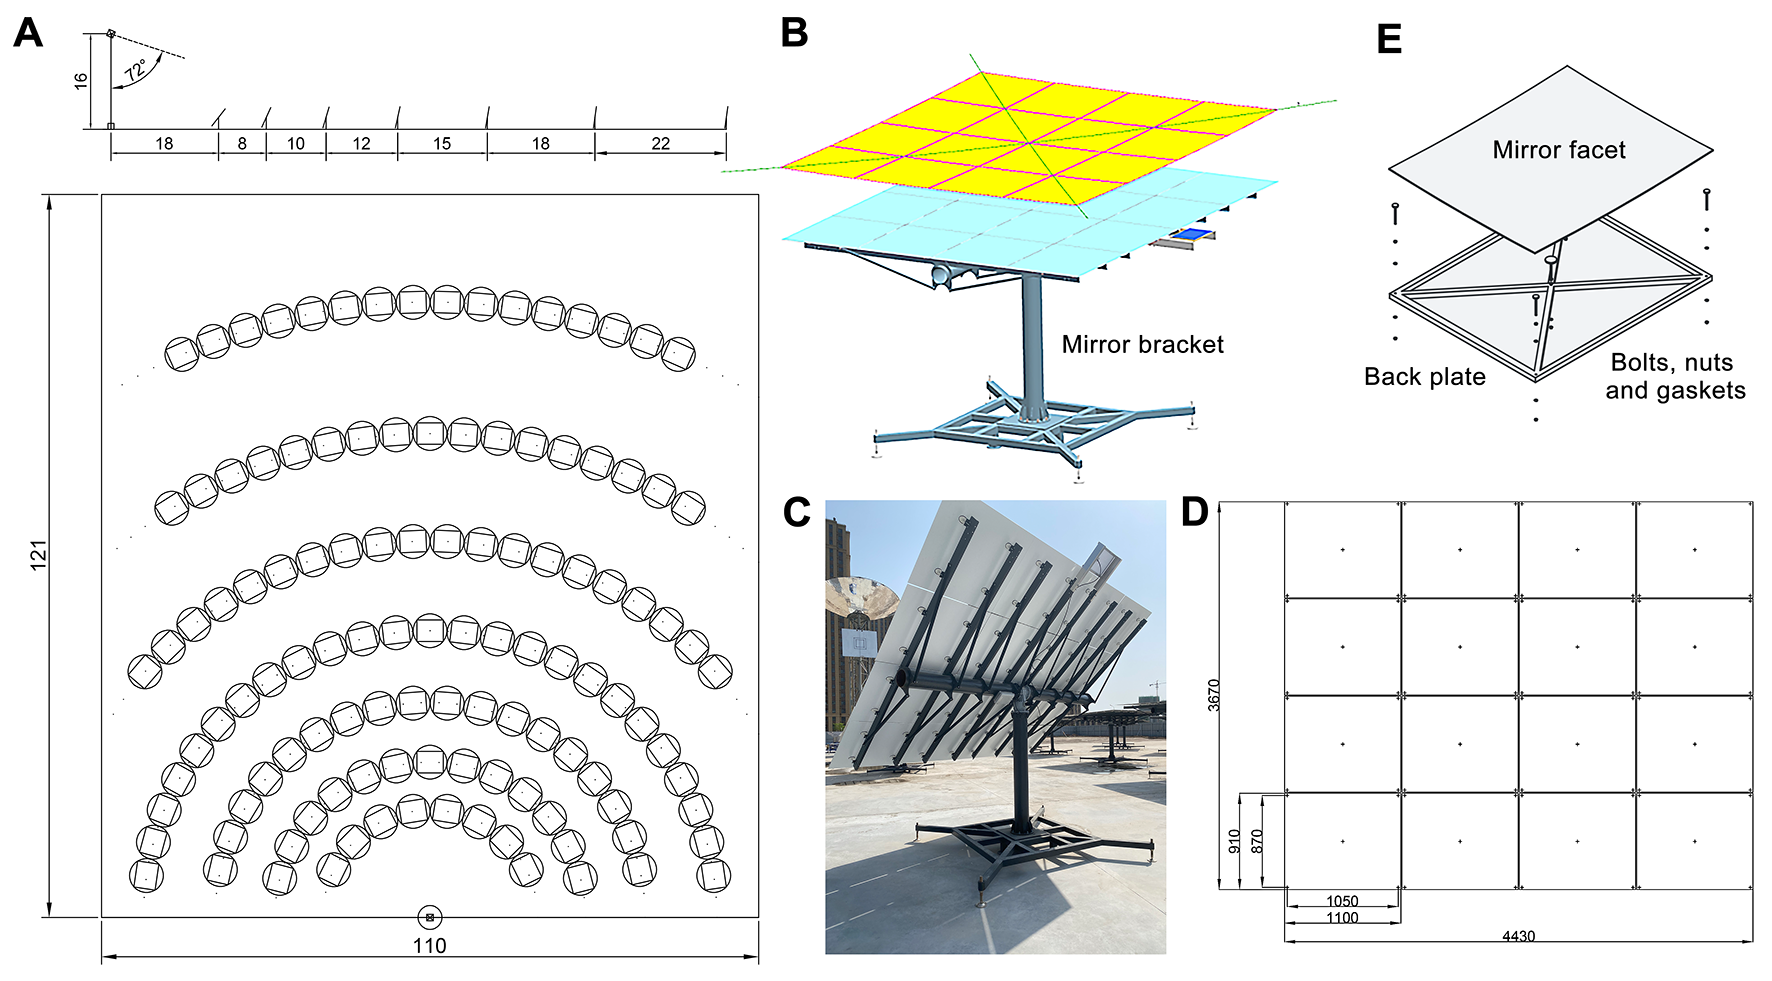


**Figure S1** The heliostat array arrangement in our platform (A), the structure of single heliostat (B, C), the back of the single heliostat (D), the 1/16 structure of the heliostat (E).


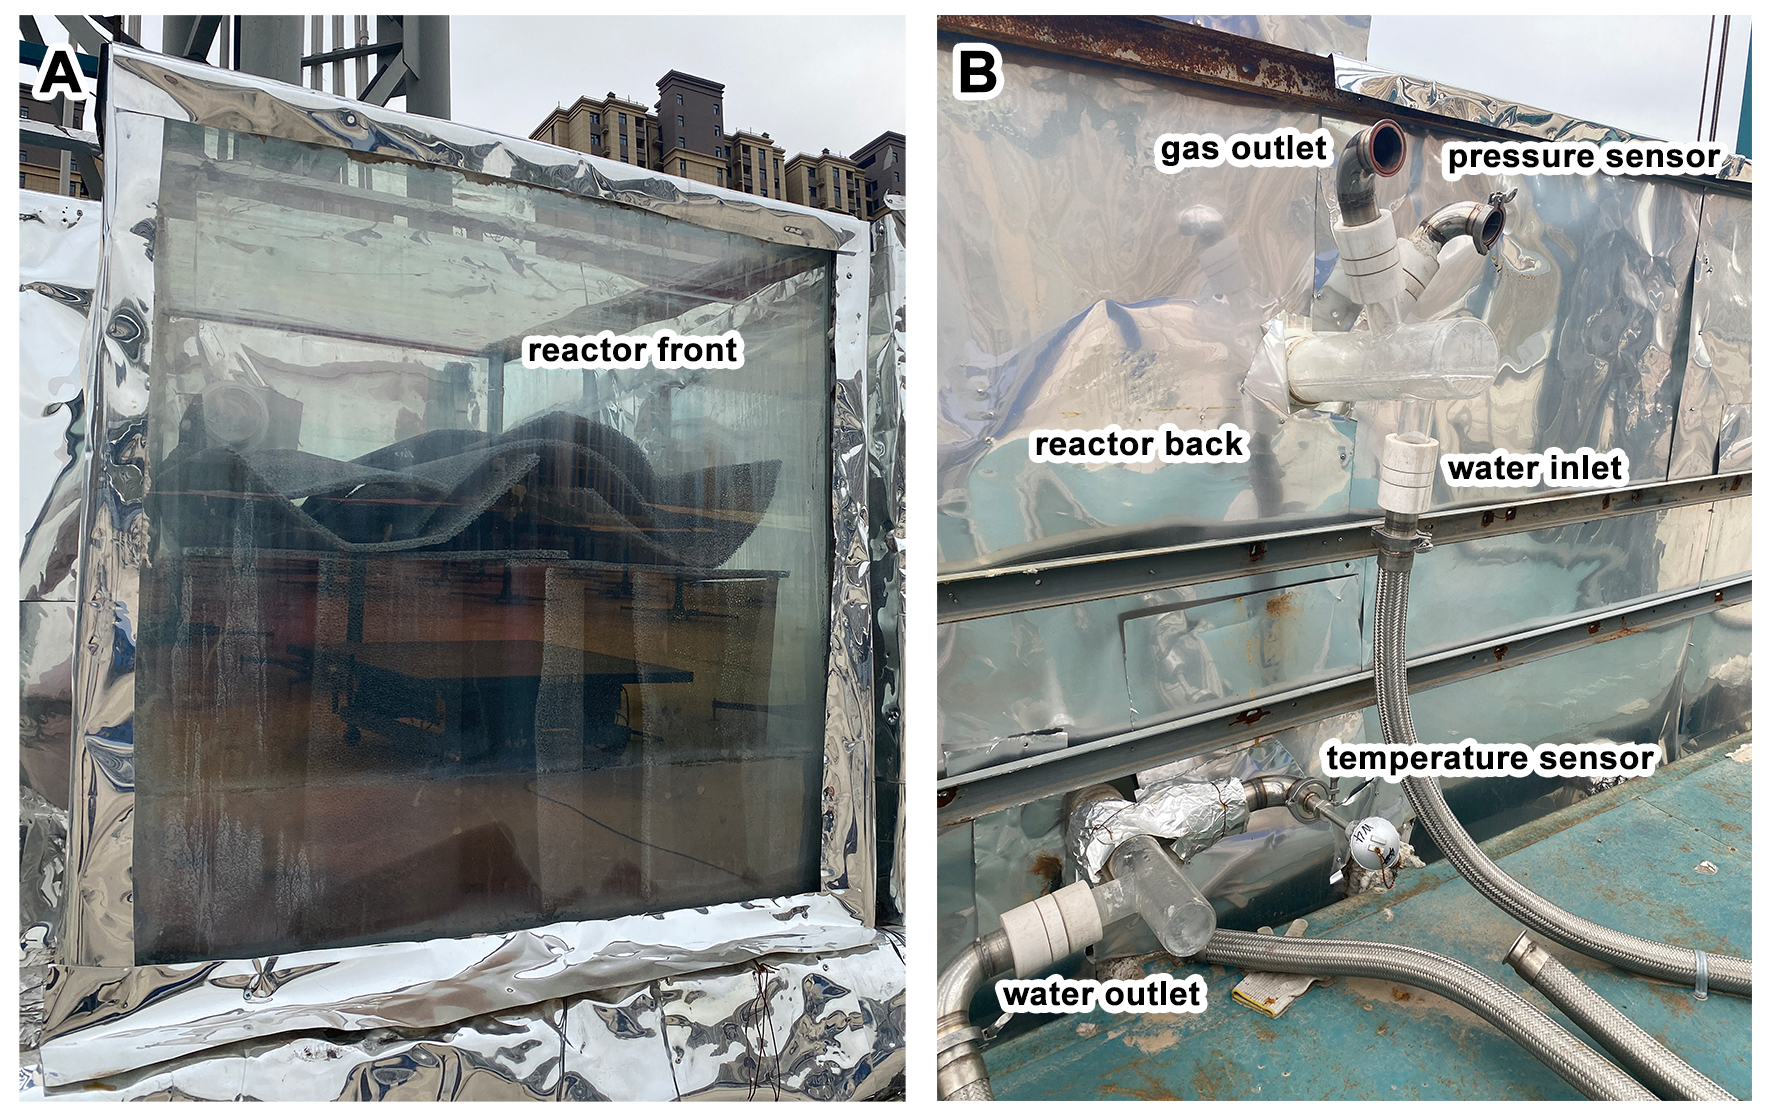


**Figure S2** The structure of the 1.3 m3 photoreactor. The reactor is sealed after orderly placing the catalyst foams.


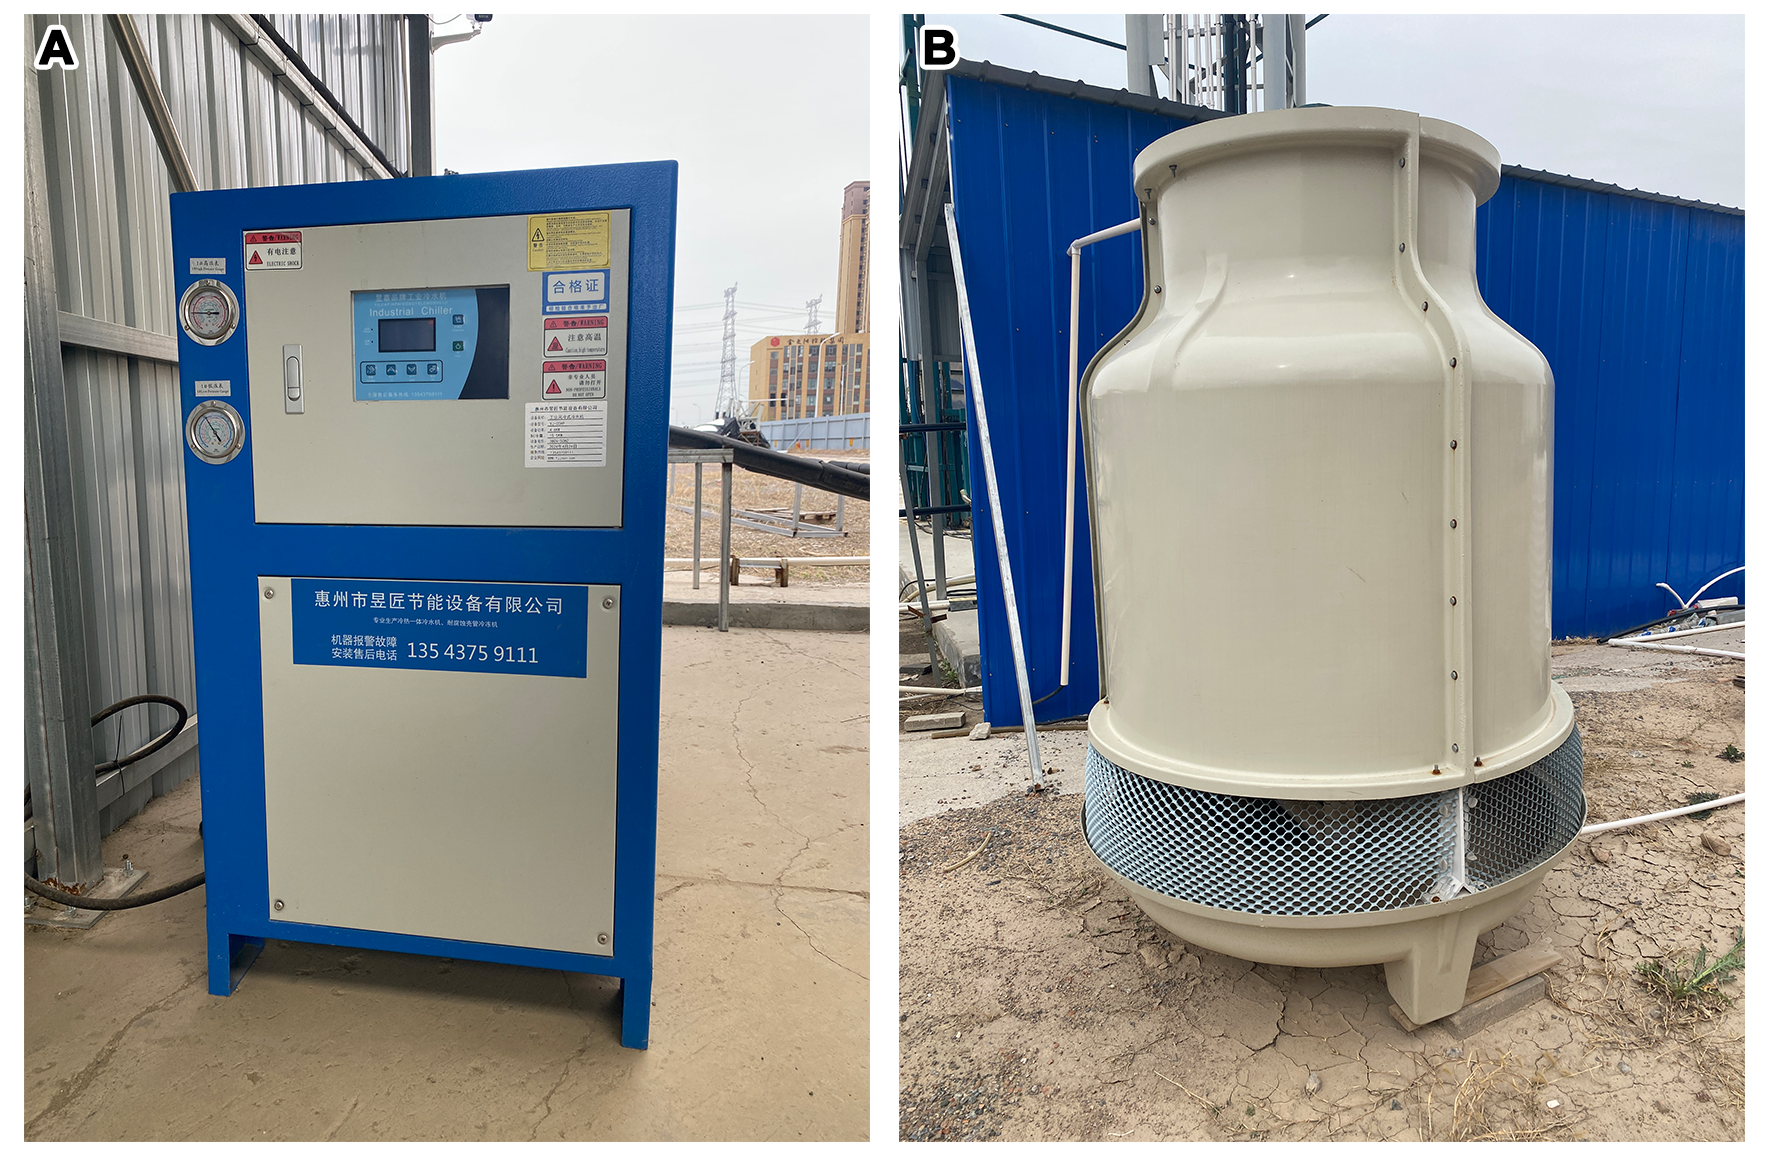


**Figure S3** Low temperature (A) and room temperature (B) water vapor cooling device.


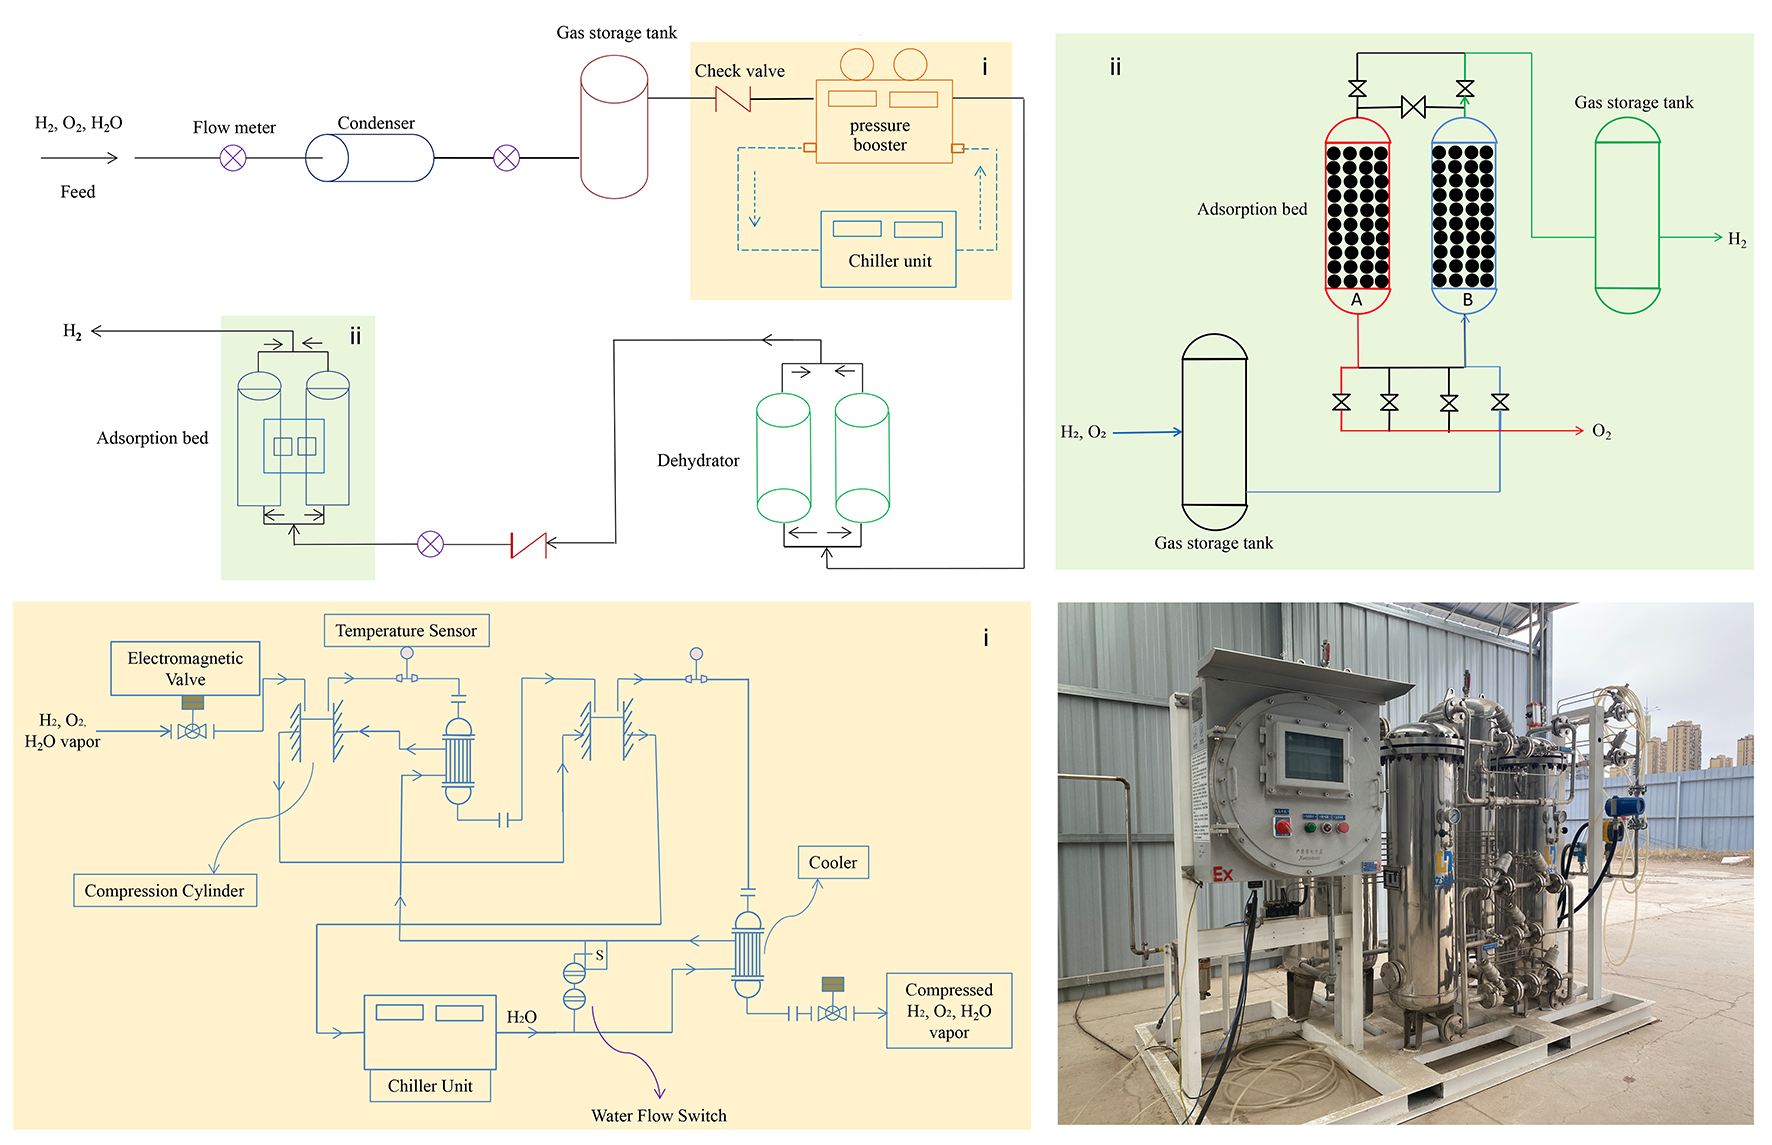


**Figure S4** The running principle and the photo of the gas separation device. The device consists by condenser, pre-adsorption gas storage tank, pressure booster, chiller unit, dehydrator, adsorption bed, post-adsorption gas storage tank, and hydrogen detector. In a typical separation process, the produced oxyhydrogen and water vapor pass through the condenser, then enter the gas storage tank. Once the mixed gases in the storage tank reach a certain pressure, the gas booster is activated to compress the gases. After that, the compressed gas enters the dehydrator to remove residual water vapor from the mixture, followed by pressure swing adsorption to eliminate oxygen from the mixture to get purified H2.


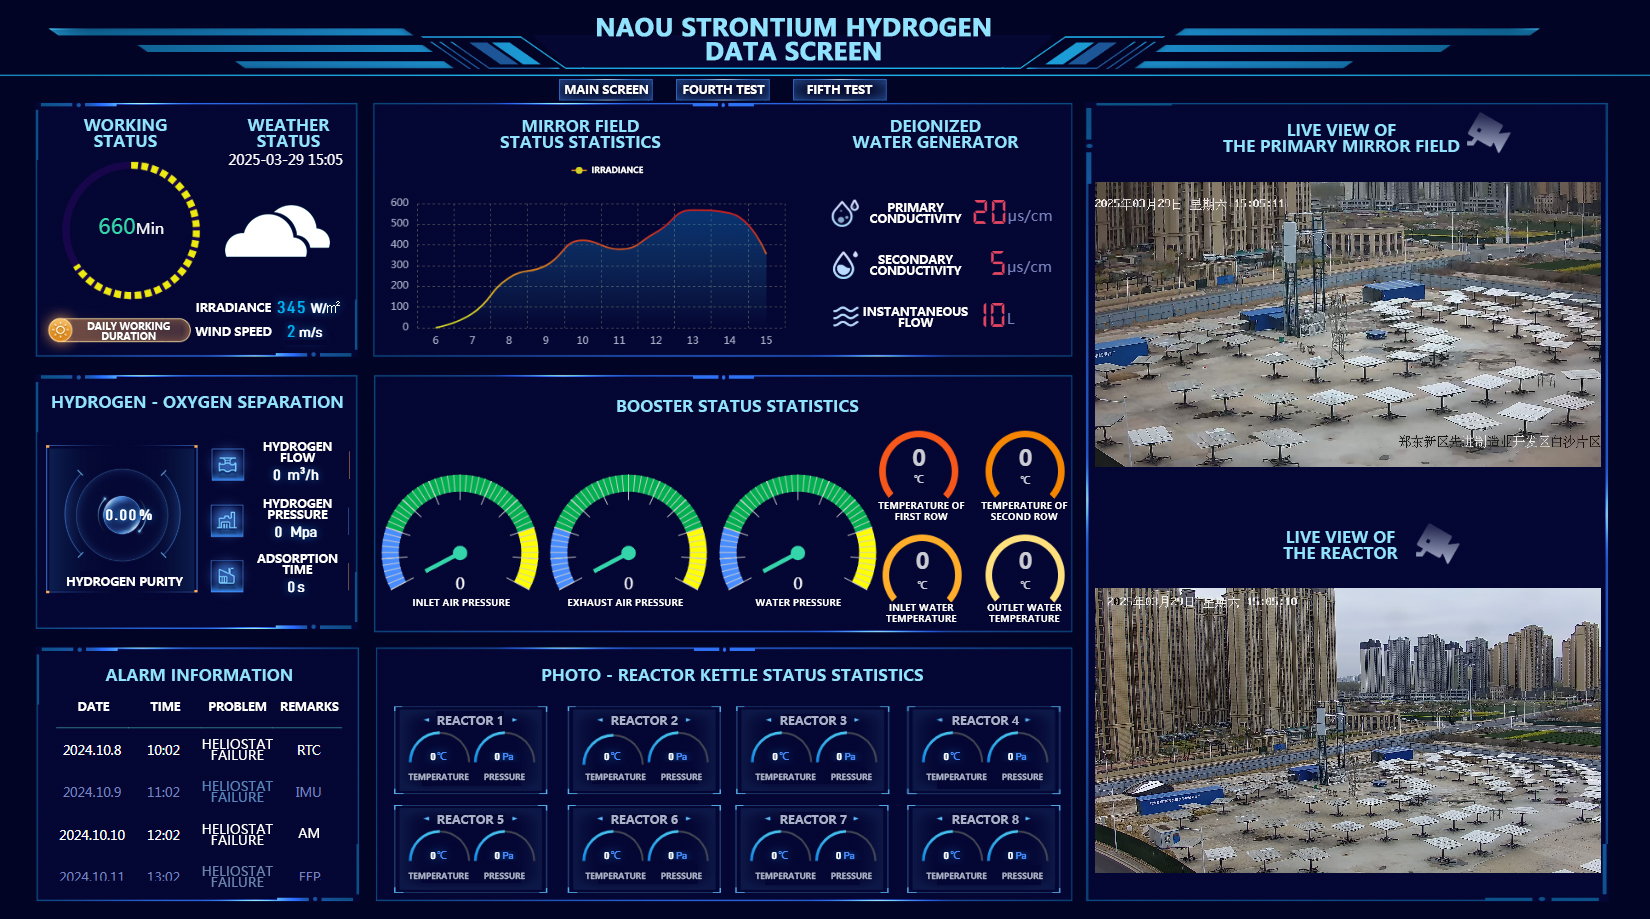


**Figure S5** In-time indoor monitor screen, which can give the status of weather, irradiance, deionized water, hydrogen purity, oxygen purity, water temperature, reactor temperature, reactor inside pressure, alarm information, and the live view of the whole system automatically. This screen is installed in another building and about 200 m away from the experimental field.


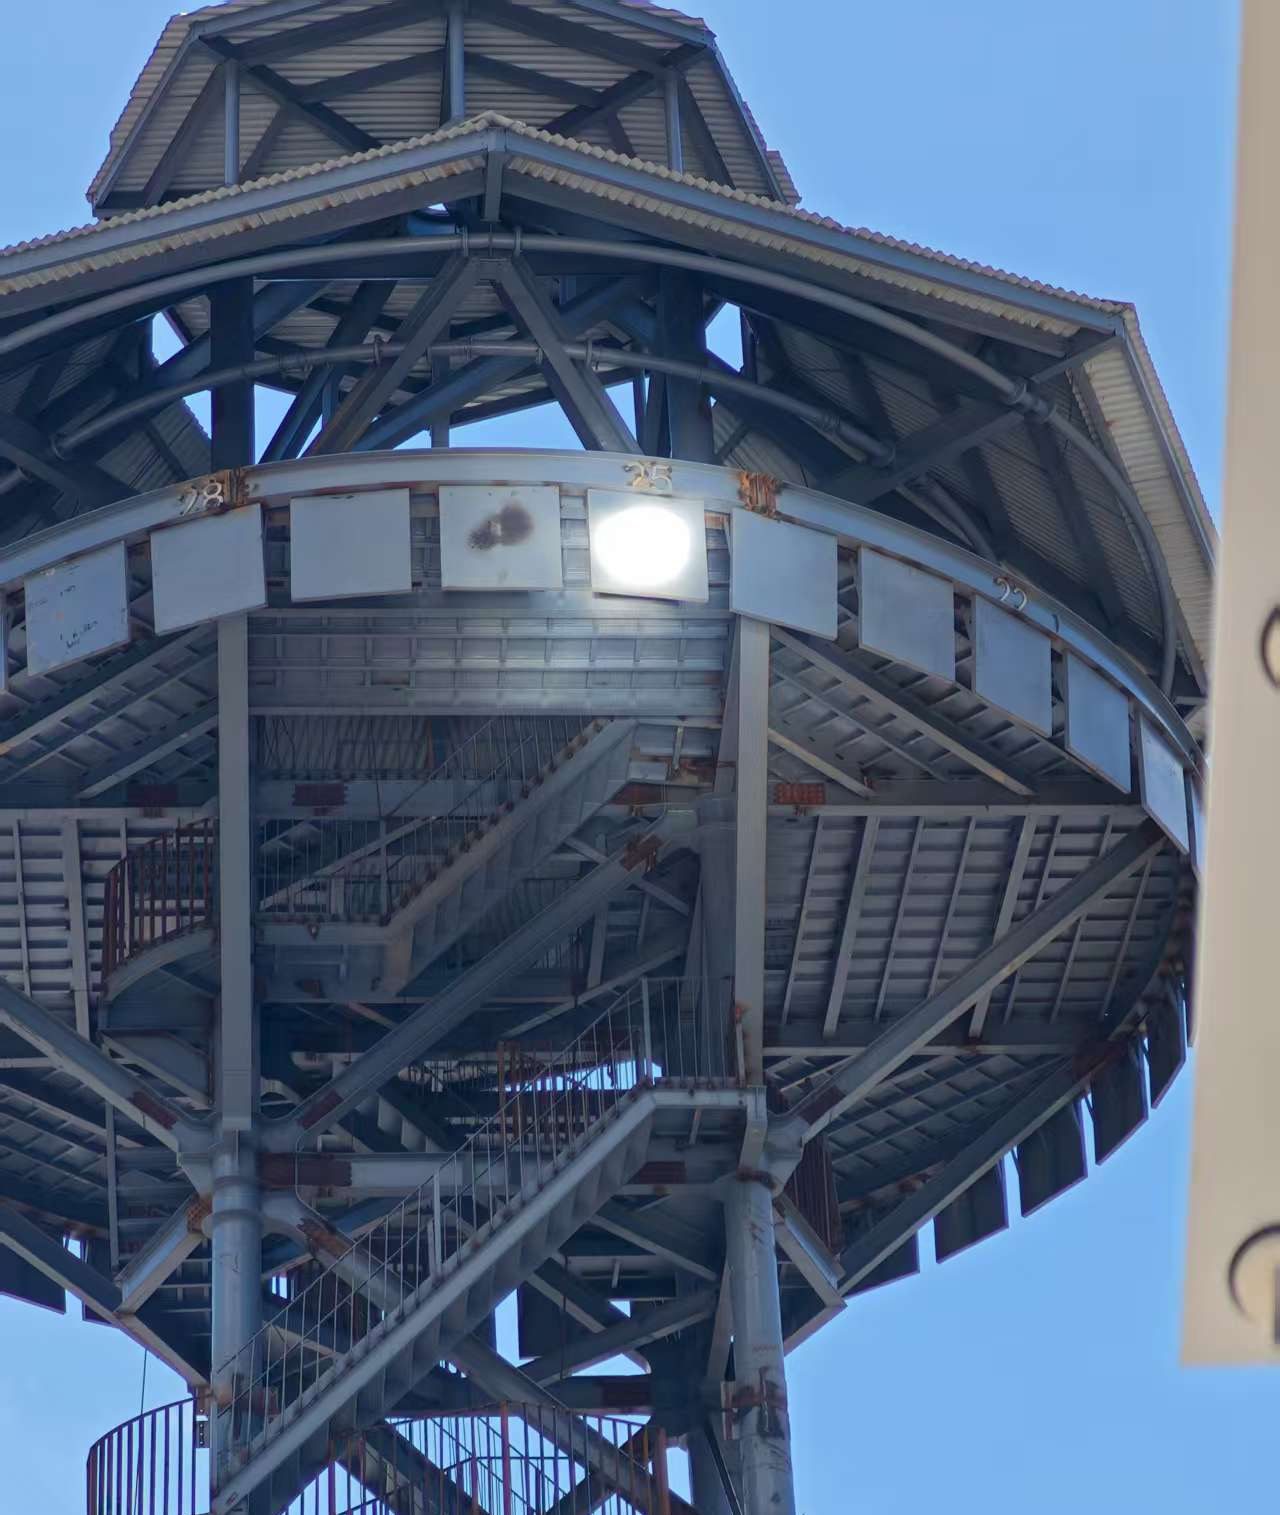


**Figure S6** Photograph of sunlight concentrated onto the target by heliostats. The minimum sunlight concentration area is approximately 0.4 m2.


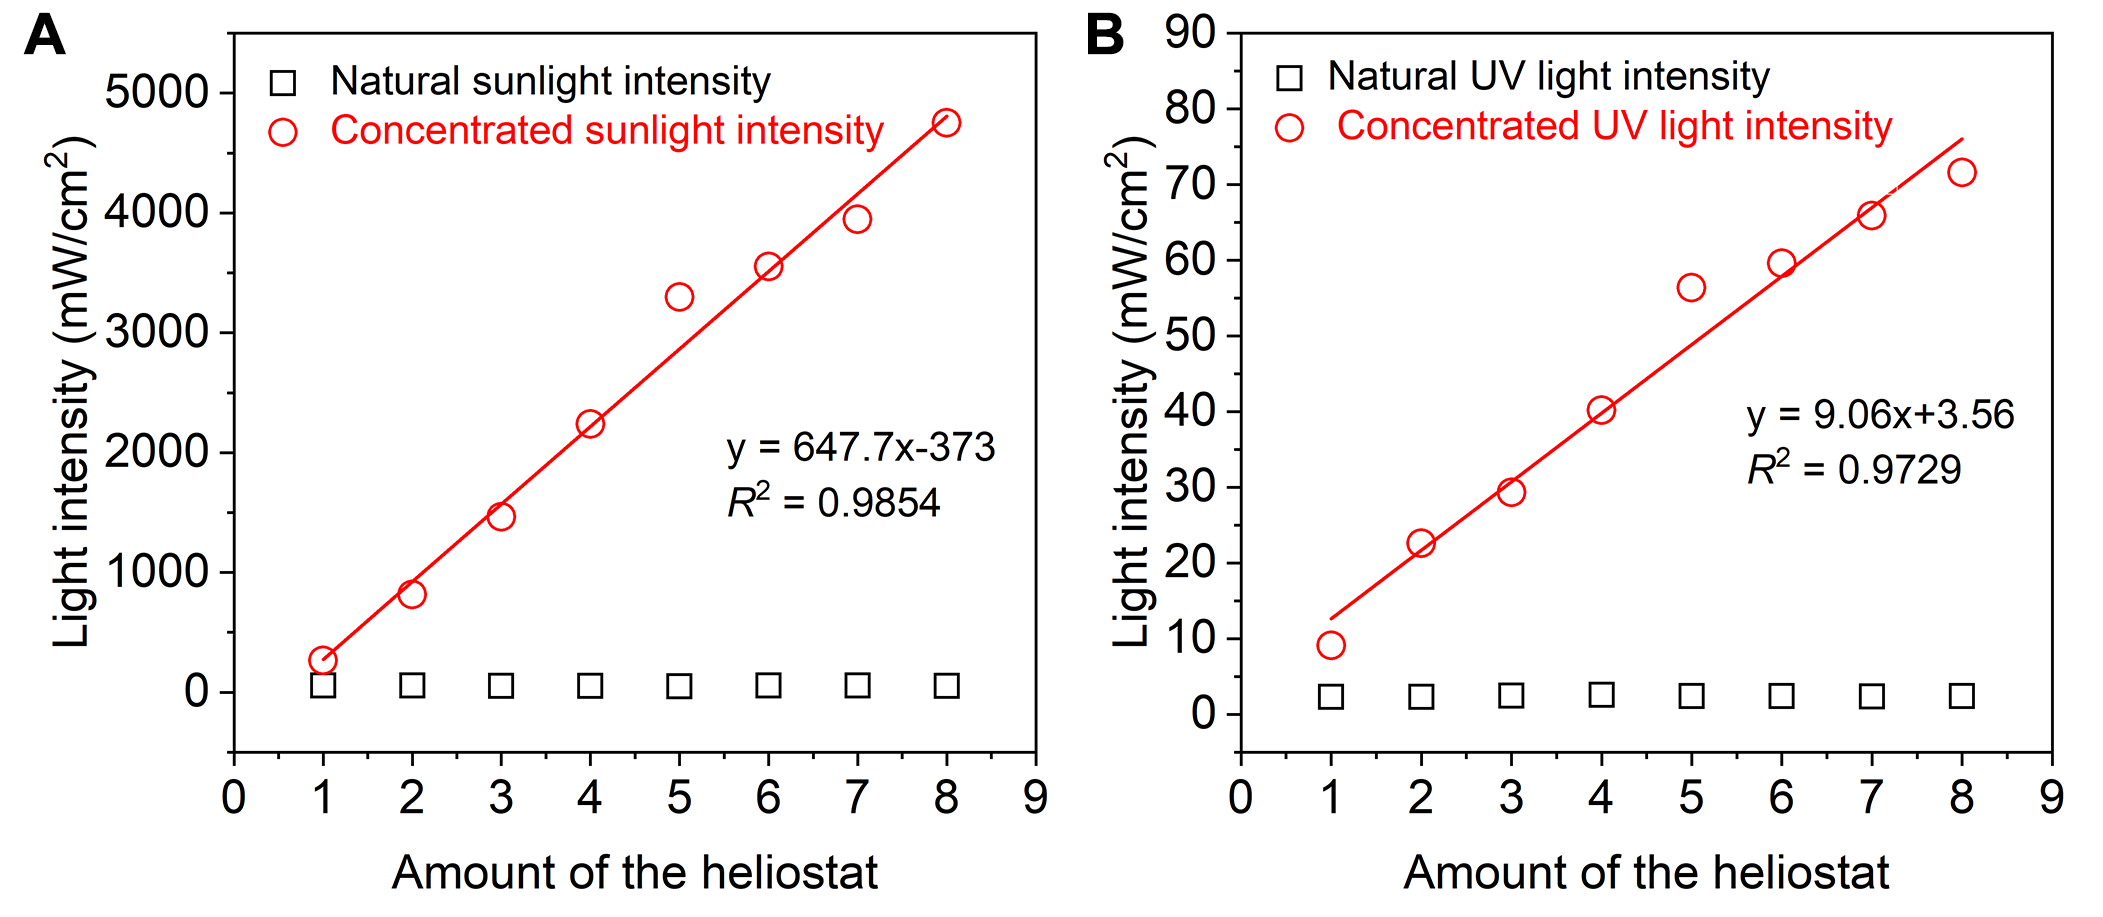


**Figure S7** The relation between the number of the heliostat and the condensed natural sunlight energy (A), UV light energy (B).


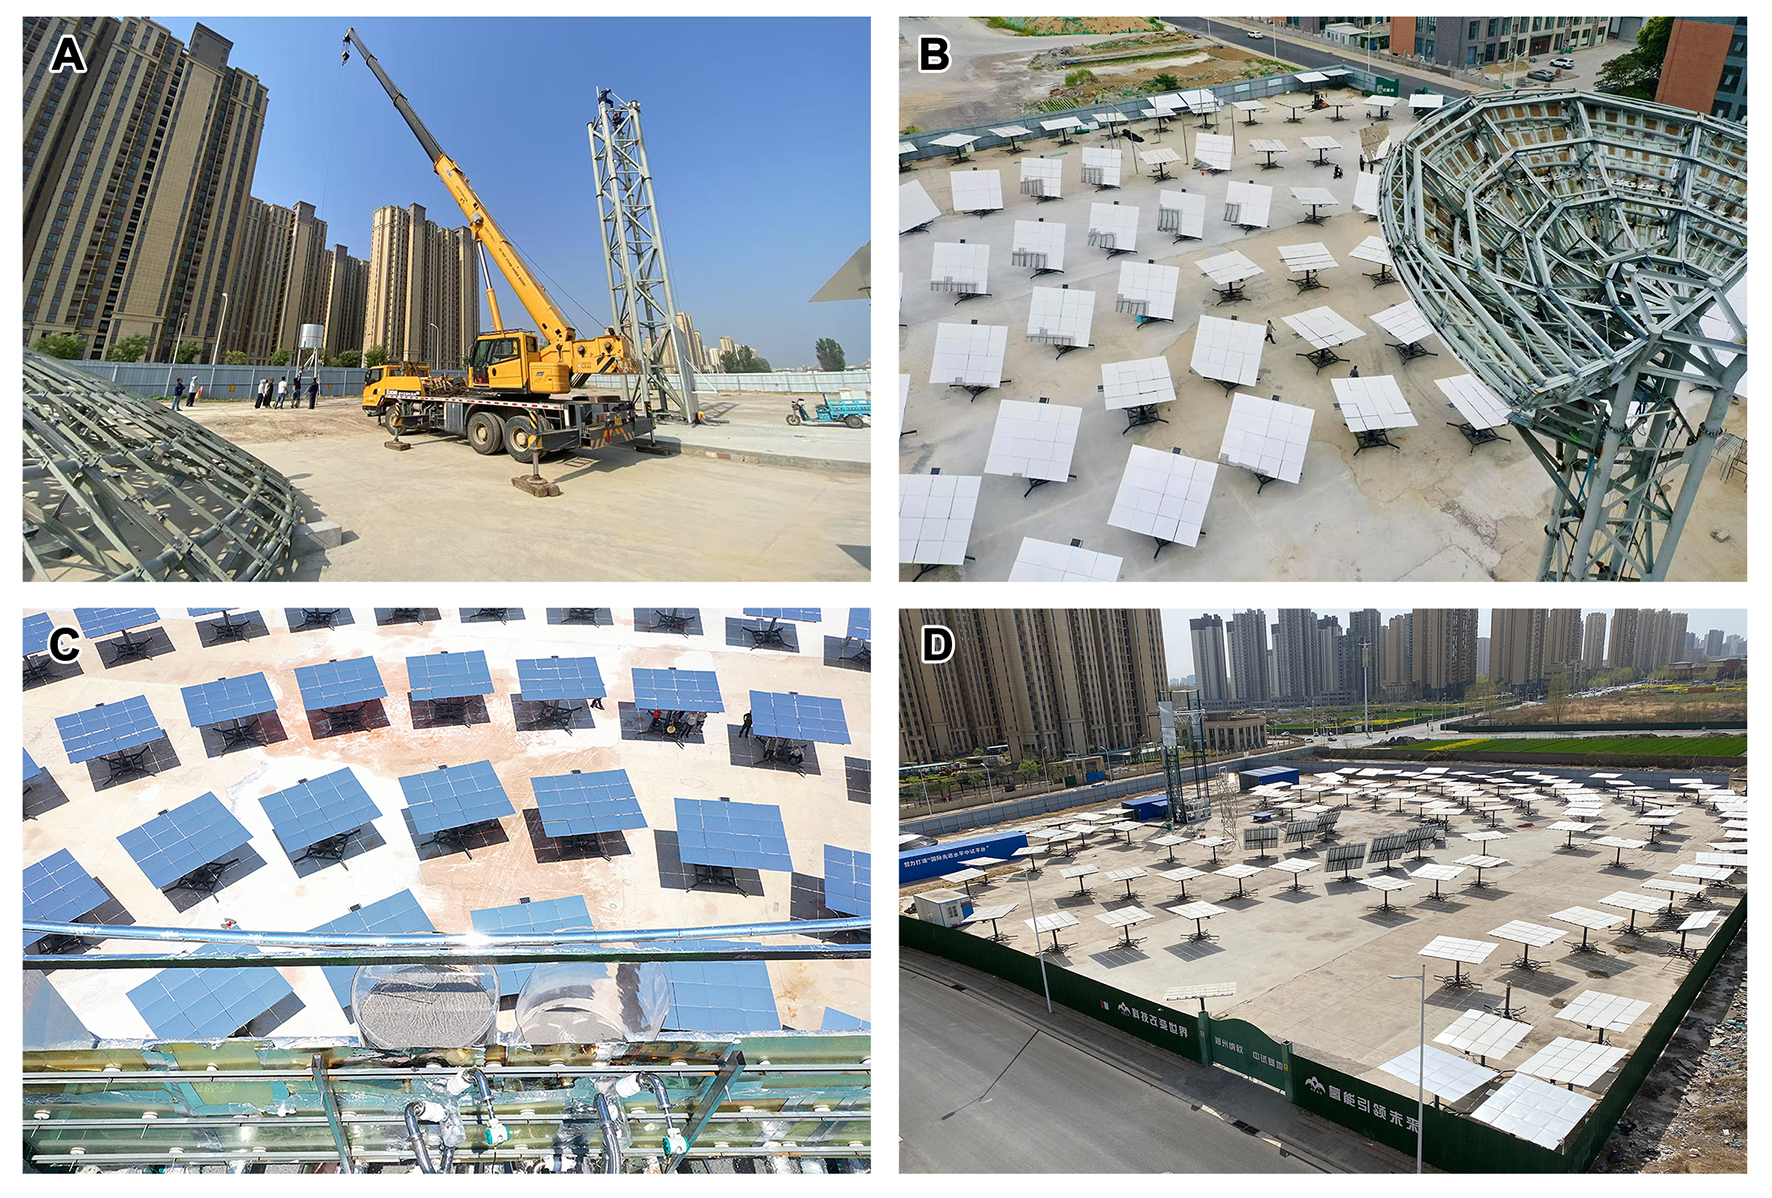


**Figure S8** The building process of the world largest high-energy “sunlight condense” equipment. Sunlight-concentrating tower with 16 m height (A). Parabolic secondary reflector (B). Single-reflection concentrating system (C, D).


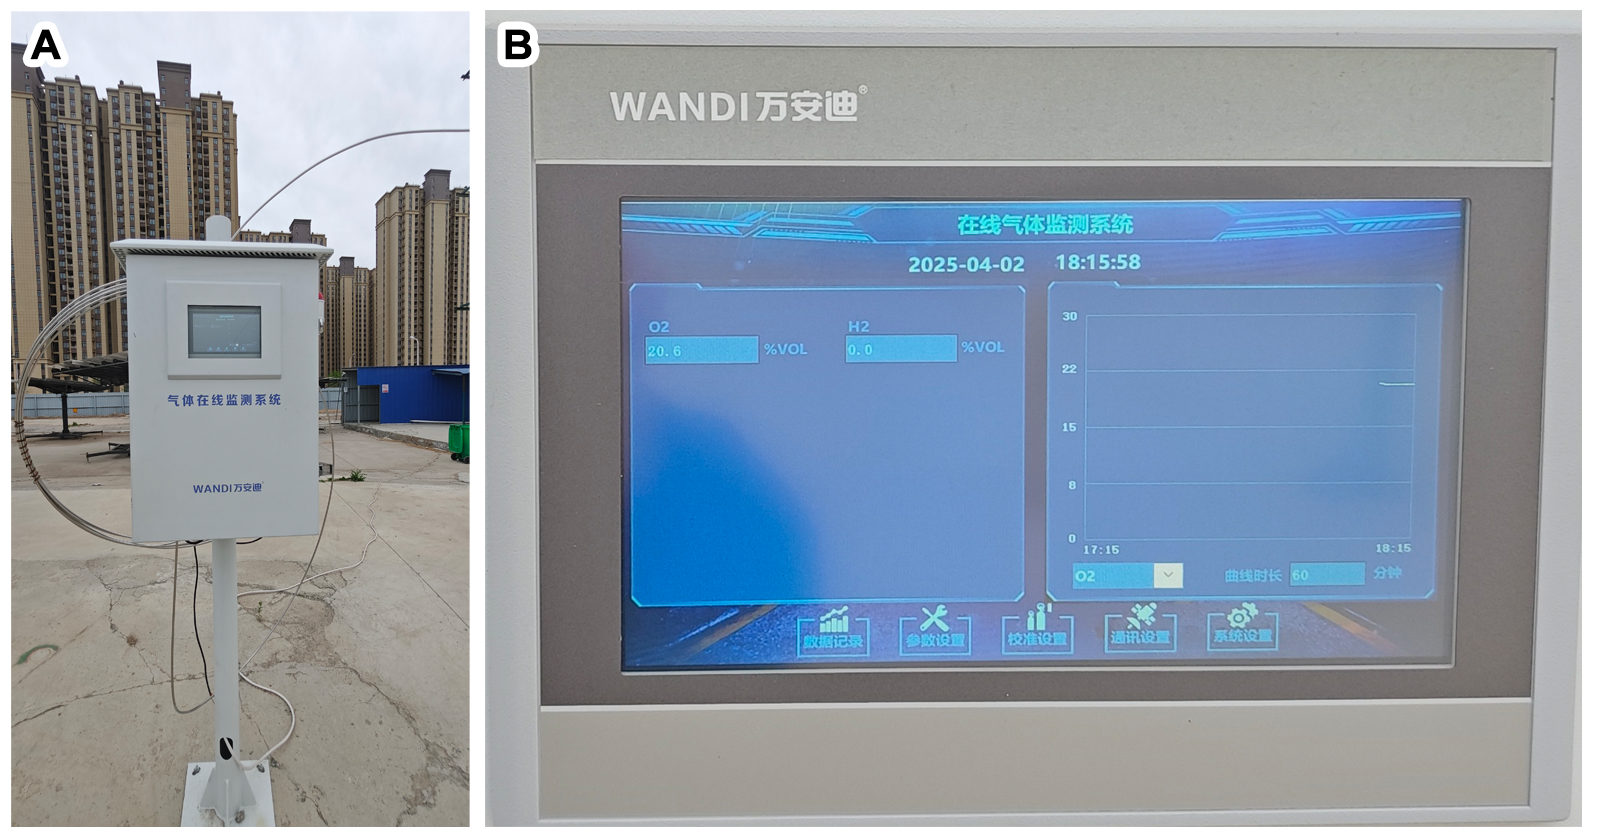


**Figure S9**The on-line electronic gas flow meter. The device can record and exhibit the purity of the H2 and O2 during experiment.


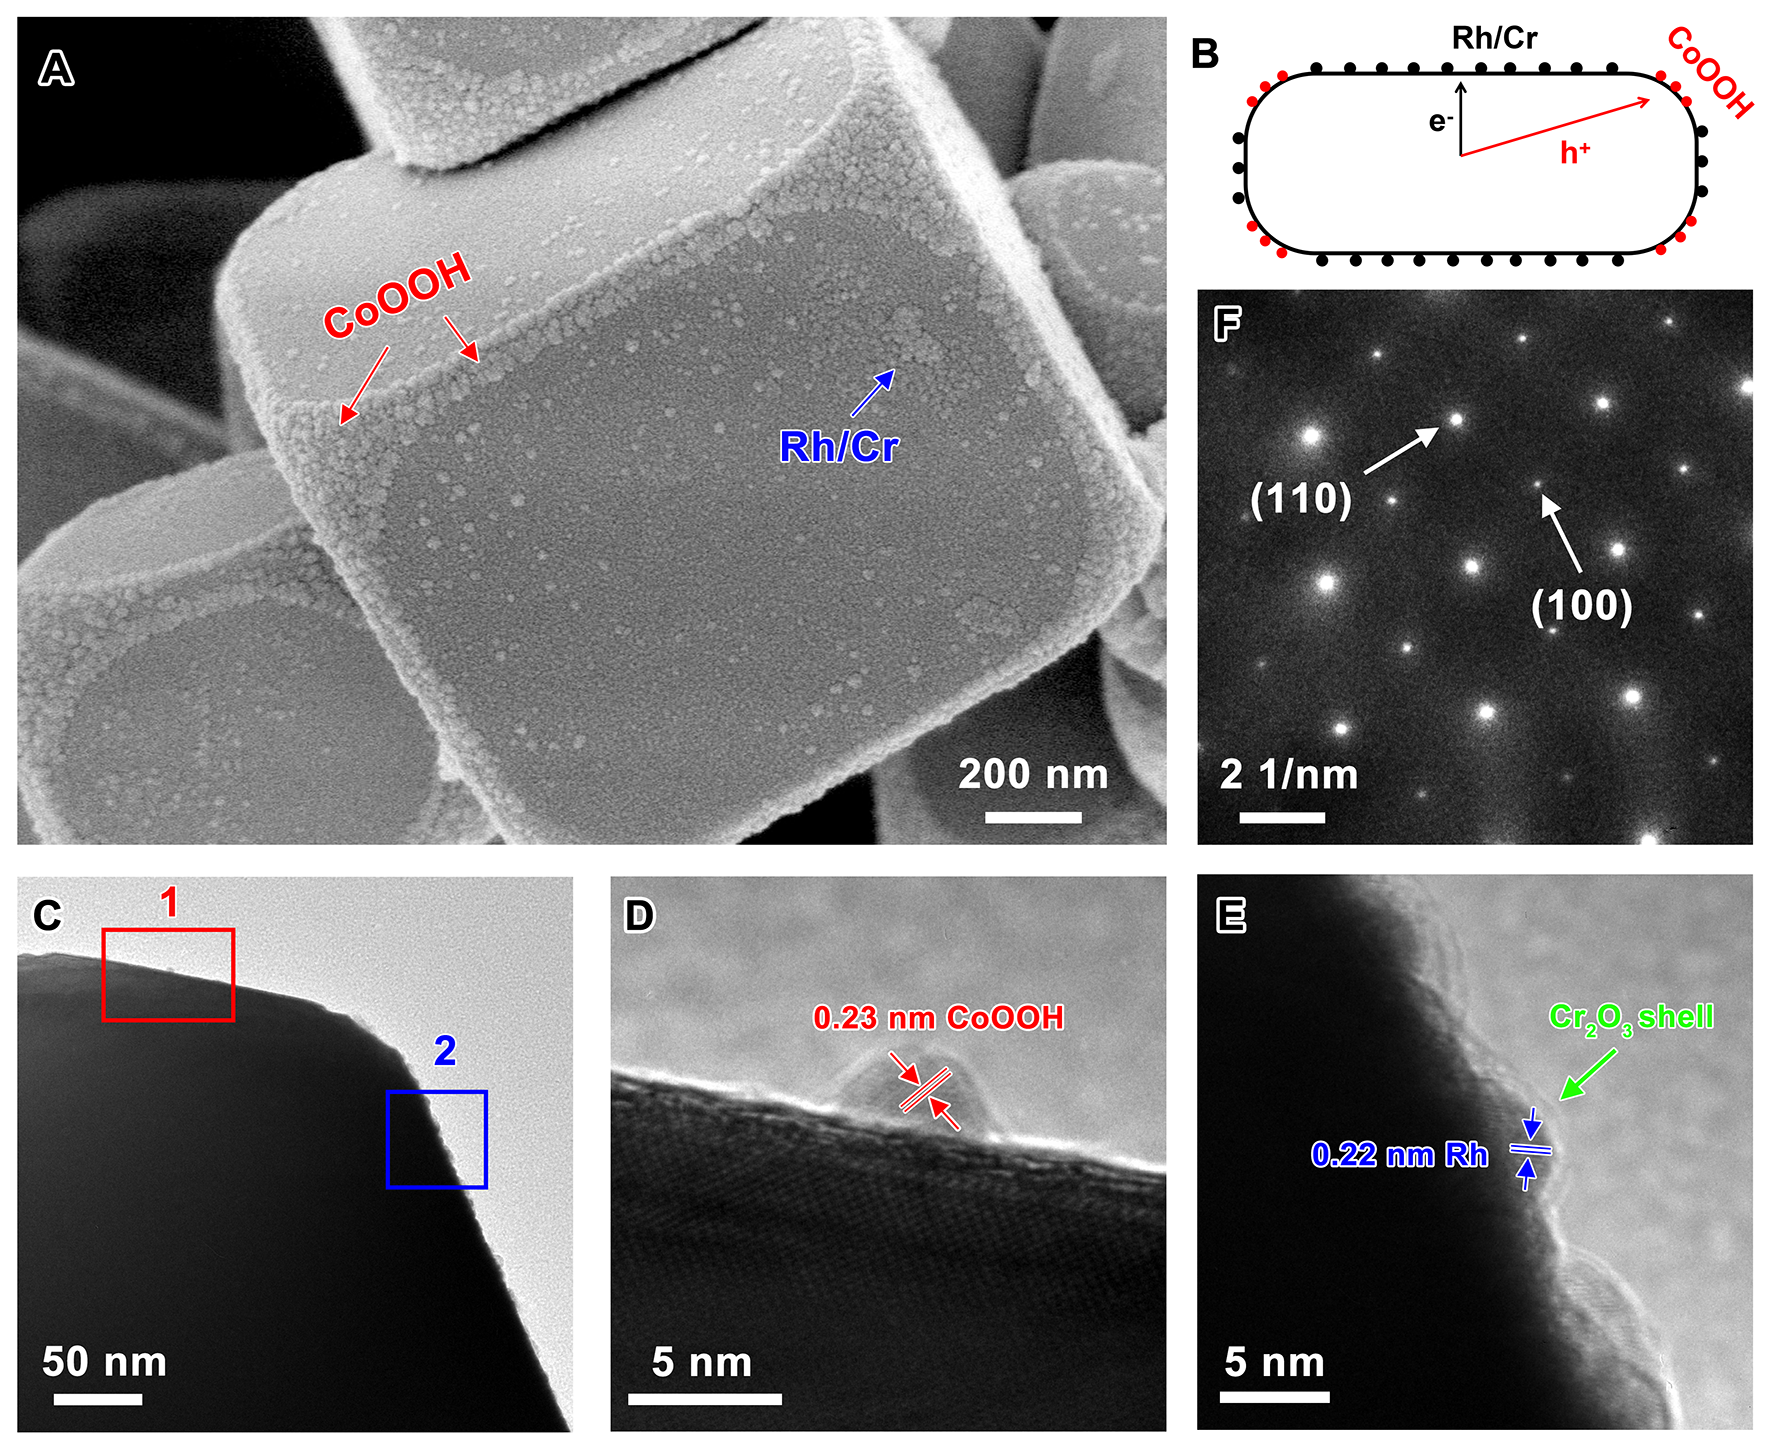


**Figure S10** Characterization of the modified HSTO:Al(RhCrCo) catalyst. The HSTO:Al exhibits anisotropic crystal habits with distinct exposed facets. Specifically, the Rh/Cr2O3 cocatalyst shows a preferential deposition on the {100} crystal facets, while the CoOOH cocatalyst is deposited on the curved crystal facets, which are a combination of {111}, {110}, {112} etc. facets. This unique deposition pattern allows photo-excited electrons and holes to migrate to different crystal facets realizing spatially separate. As a result, the hydrogen evolution reaction (HER) and the oxygen evolution reaction (OER) can occur separately on these distinct crystal facets, facilitating the overall water splitting process.


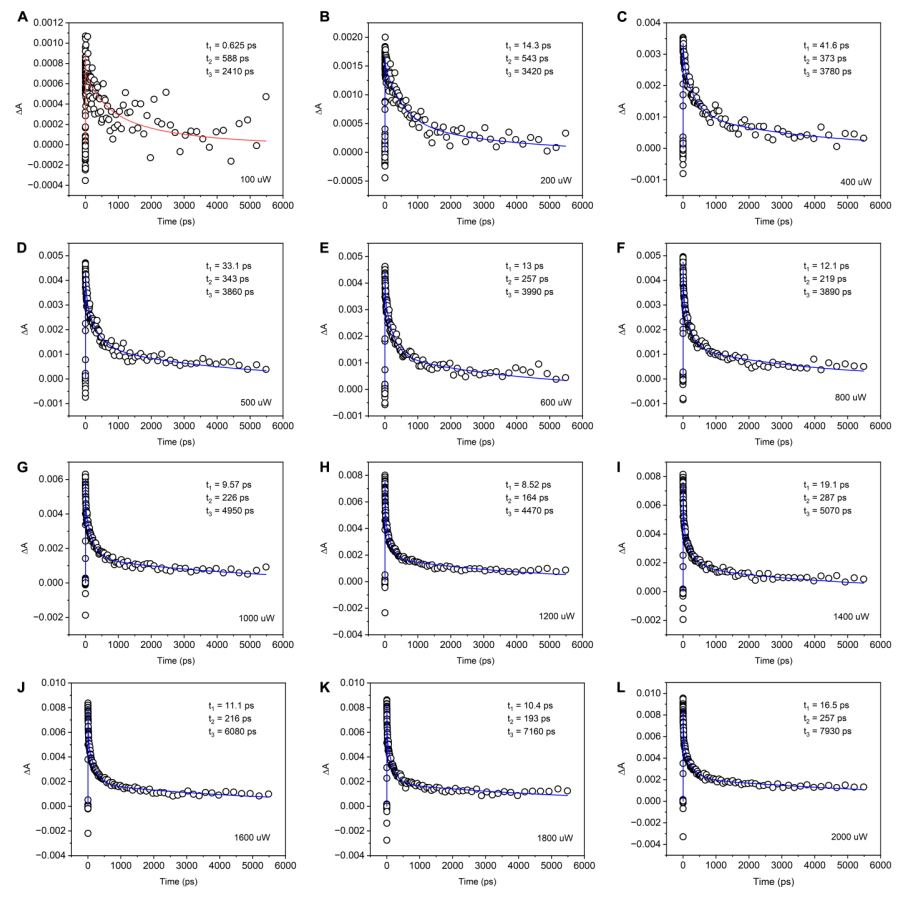


**Figure S11** Femtosecond TA kinetic traces and fitting results at ~530 nm of HSTO:Al(RhCrCo) under different pump fluences.


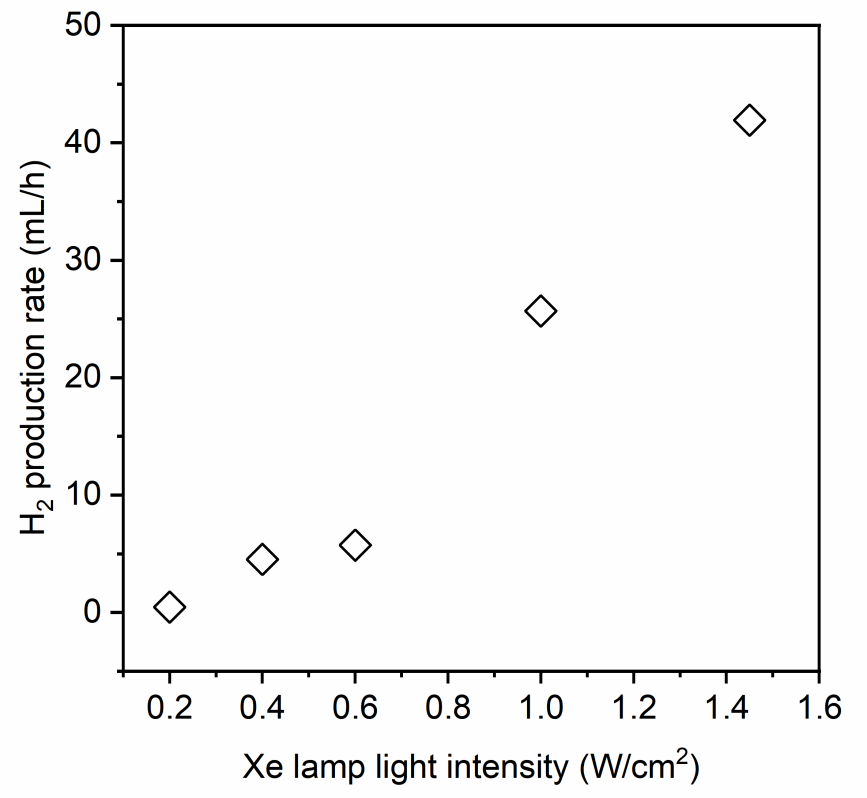


**Figure S12** H2 production performance in full-spectrum intensity (tested using a Xe lamp).





**Figure S13** UV-vis diffuse spectra of the STO:Al and STO:Al(RhCrCo) catalysts.





**Figure S14** H2 production experiments of the Al-H2O reaction under different conditions. Irritating Al powder in H2O at the light intensity of 1826.6 mW/cm2 and 6 °C, nearly no H2 can be detected. Heating Al and H2O mixture at 60 or 90 °C in the dark, large amount of H2 is evolved.


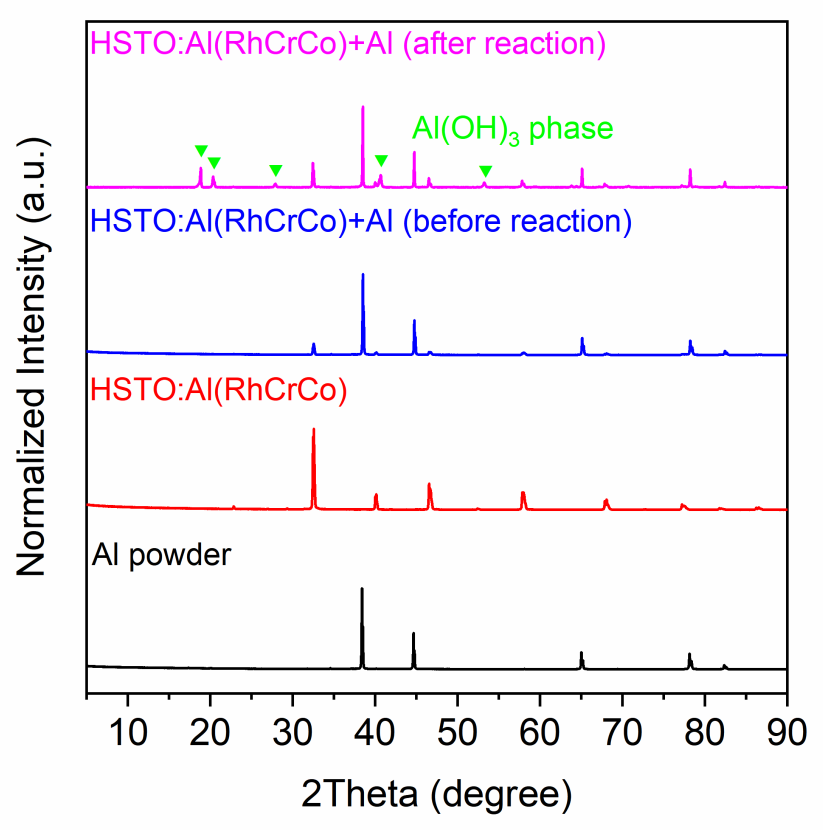


**Figure S15** PXRD patterns of the Al powder, HSTO:Al(RhCrCo), HSTO:Al(RhCrCo) + Al mixture before and after reaction. In the XRD pattern of HSTO:Al(RhCrCo) + Al mixture (after reaction), except for the peaks attributed to the unreacted Al and HSTO:Al(RhCrCo) photocatalyst, Al(OH)3 is the only main byproduct.


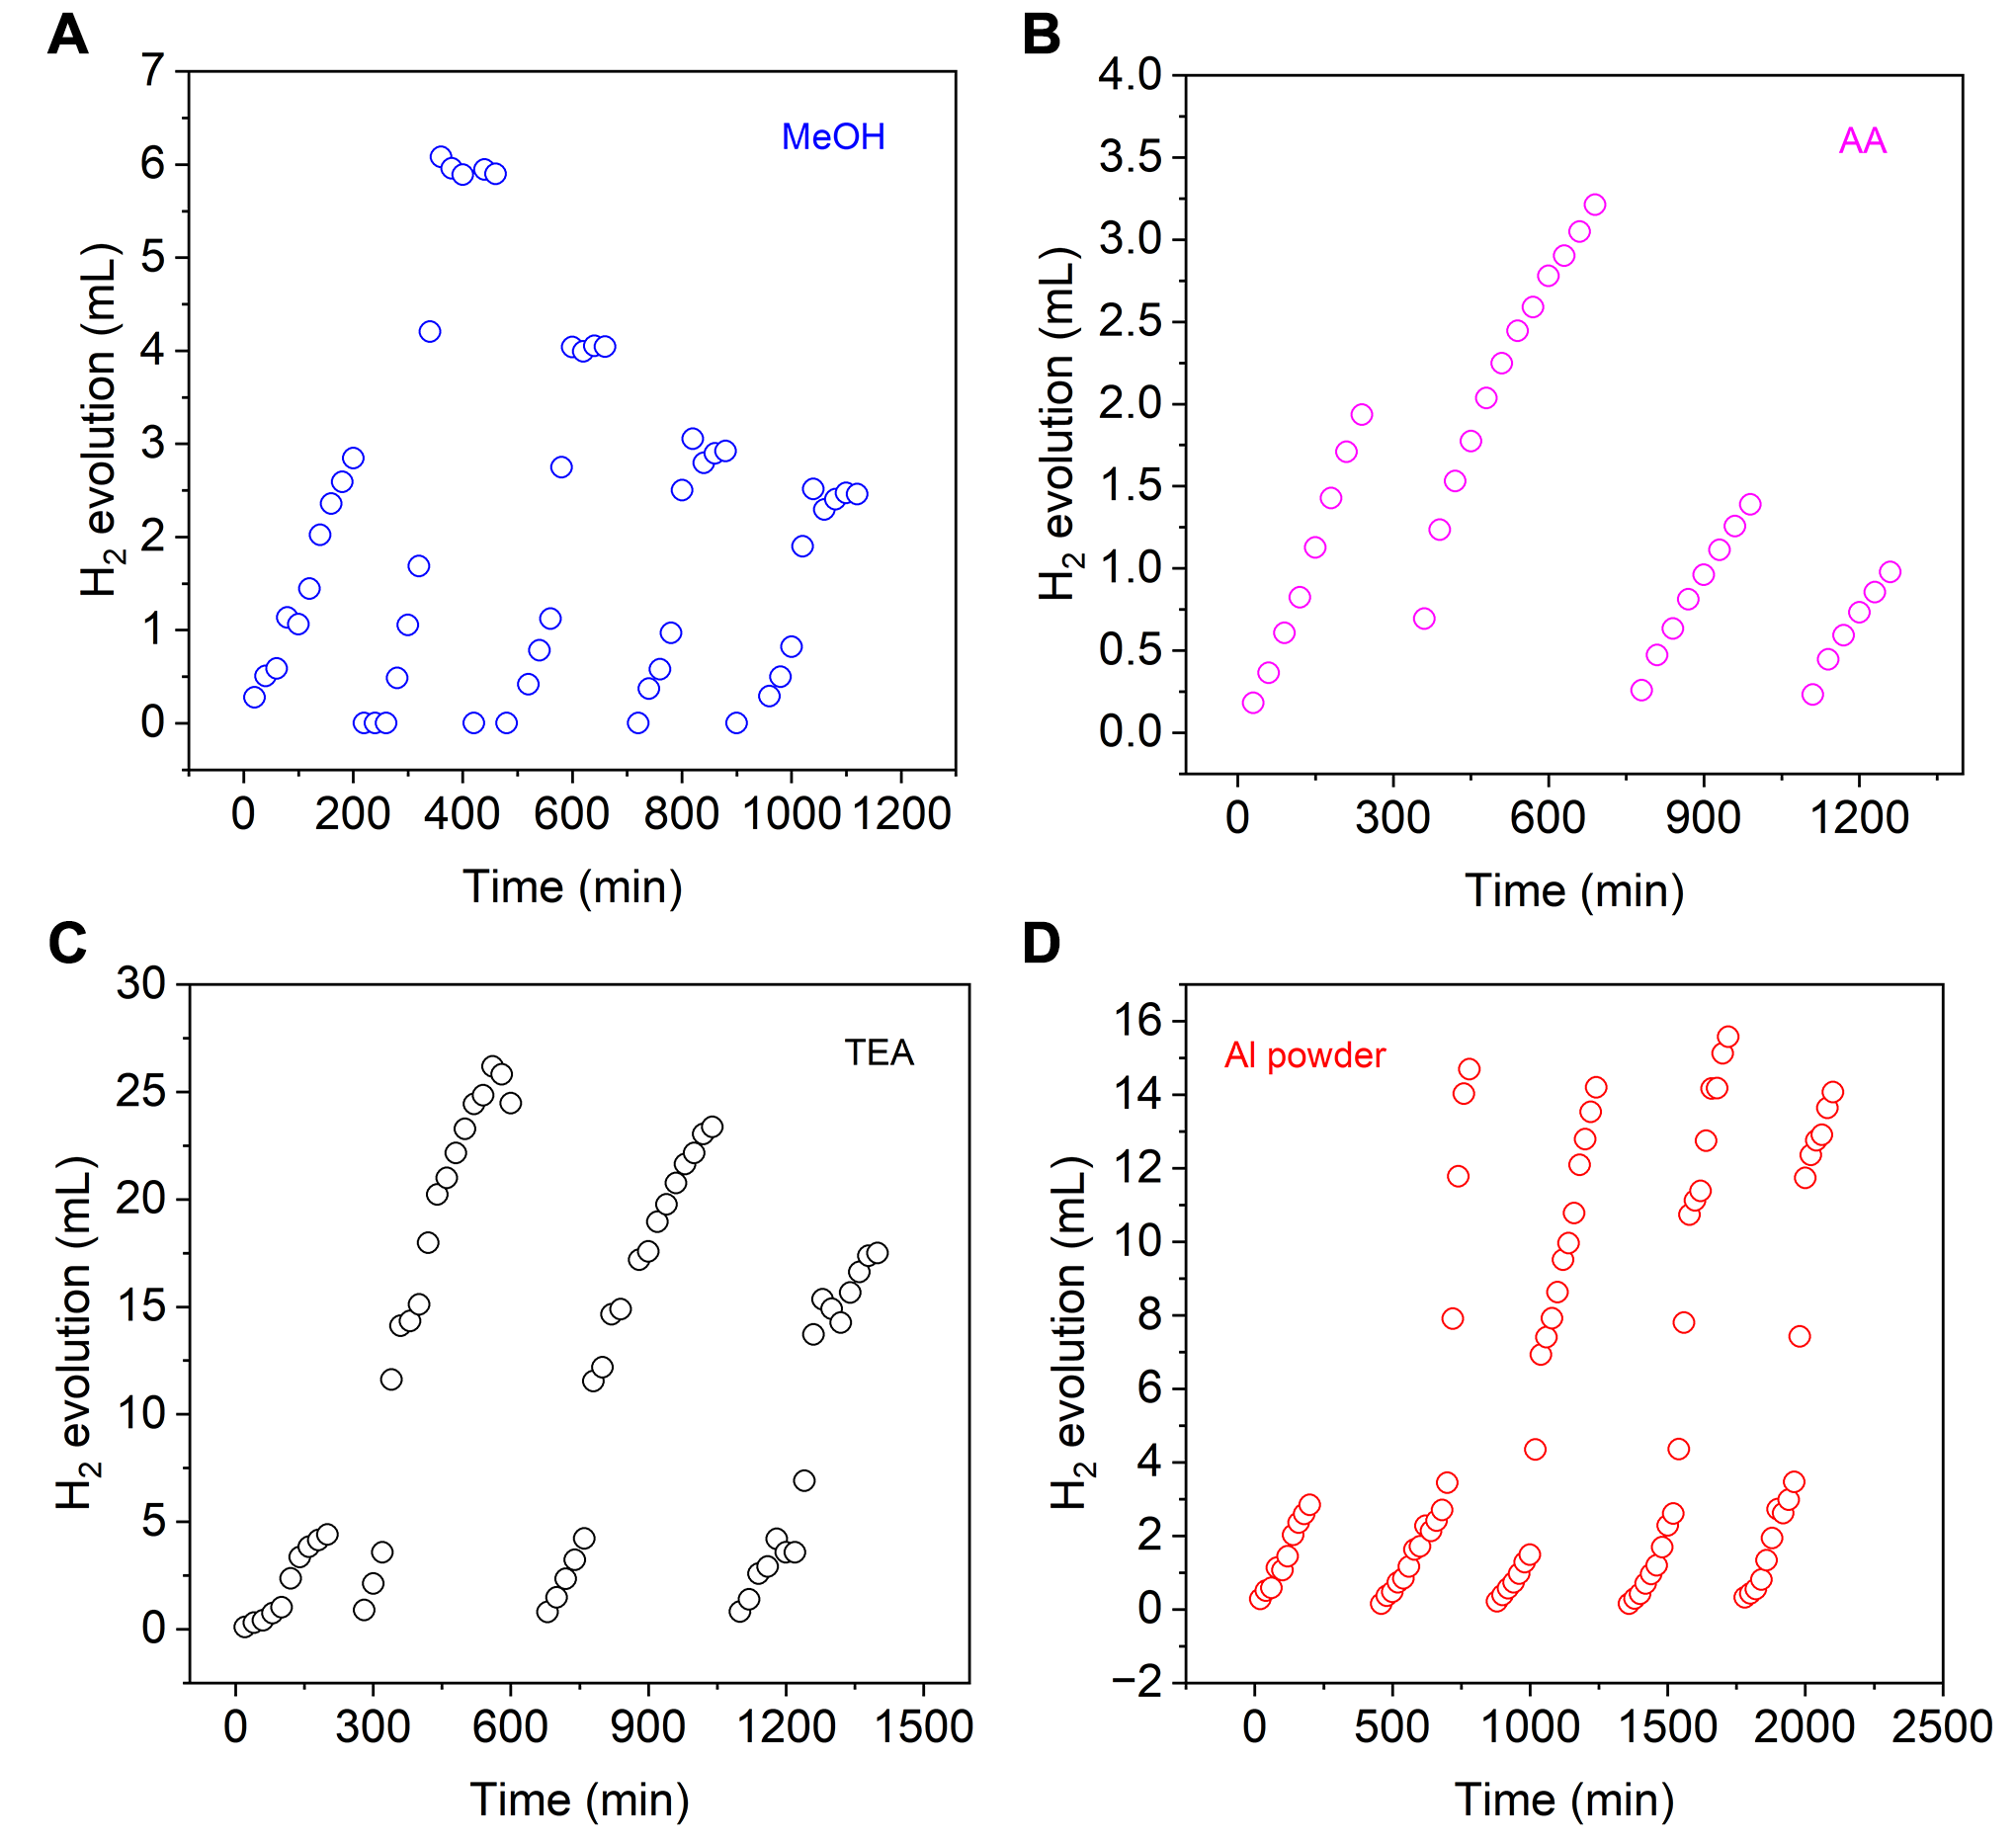


**Figure S16** Multiple addition of the sacrificial agents to the HSTO:Al(RhCrCo)-pure water system for H2 production experiments. Methanol (A), ascorbic acid (B), TEA (C) and 320 mesh Al powder (D).

As shown in **Figure S16A**, when use methanol (MeOH) as sacrificial agent, in the 1st round of test, pure H2 can be obtained and the evolution rate is about 2 times that of without MeOH, no oxygen is detected. However, after a certain time, H2 evolution rate dramatically decrease to zero. After adding new MeOH (2ndor more round oftest), H2 evolves again, however, the production rate goes through a continuous decrease and even worse than without MeOH. Similar phenomenon also occurs on other common used sacrificial agents like ascorbic acid (AA) and TEA (**Figure S16B**, **C**). The reason can be attributed that (i) the decomposition of the sacrifice reagents in the 1st round addition generates much complex byproducts which are unable to be separated from the reaction solution, thus forming chemical balance to prevent them from continuous consuming photoholes, and (ii) the byproducts block the active sites of the catalyst. Obviously, adding sacrificial agent is not a good solution in the continuous industrial production, especially considering the potential harmful gas byproducts which might also greatly decrease the quality of green hydrogen and need extra complex separation procedures.


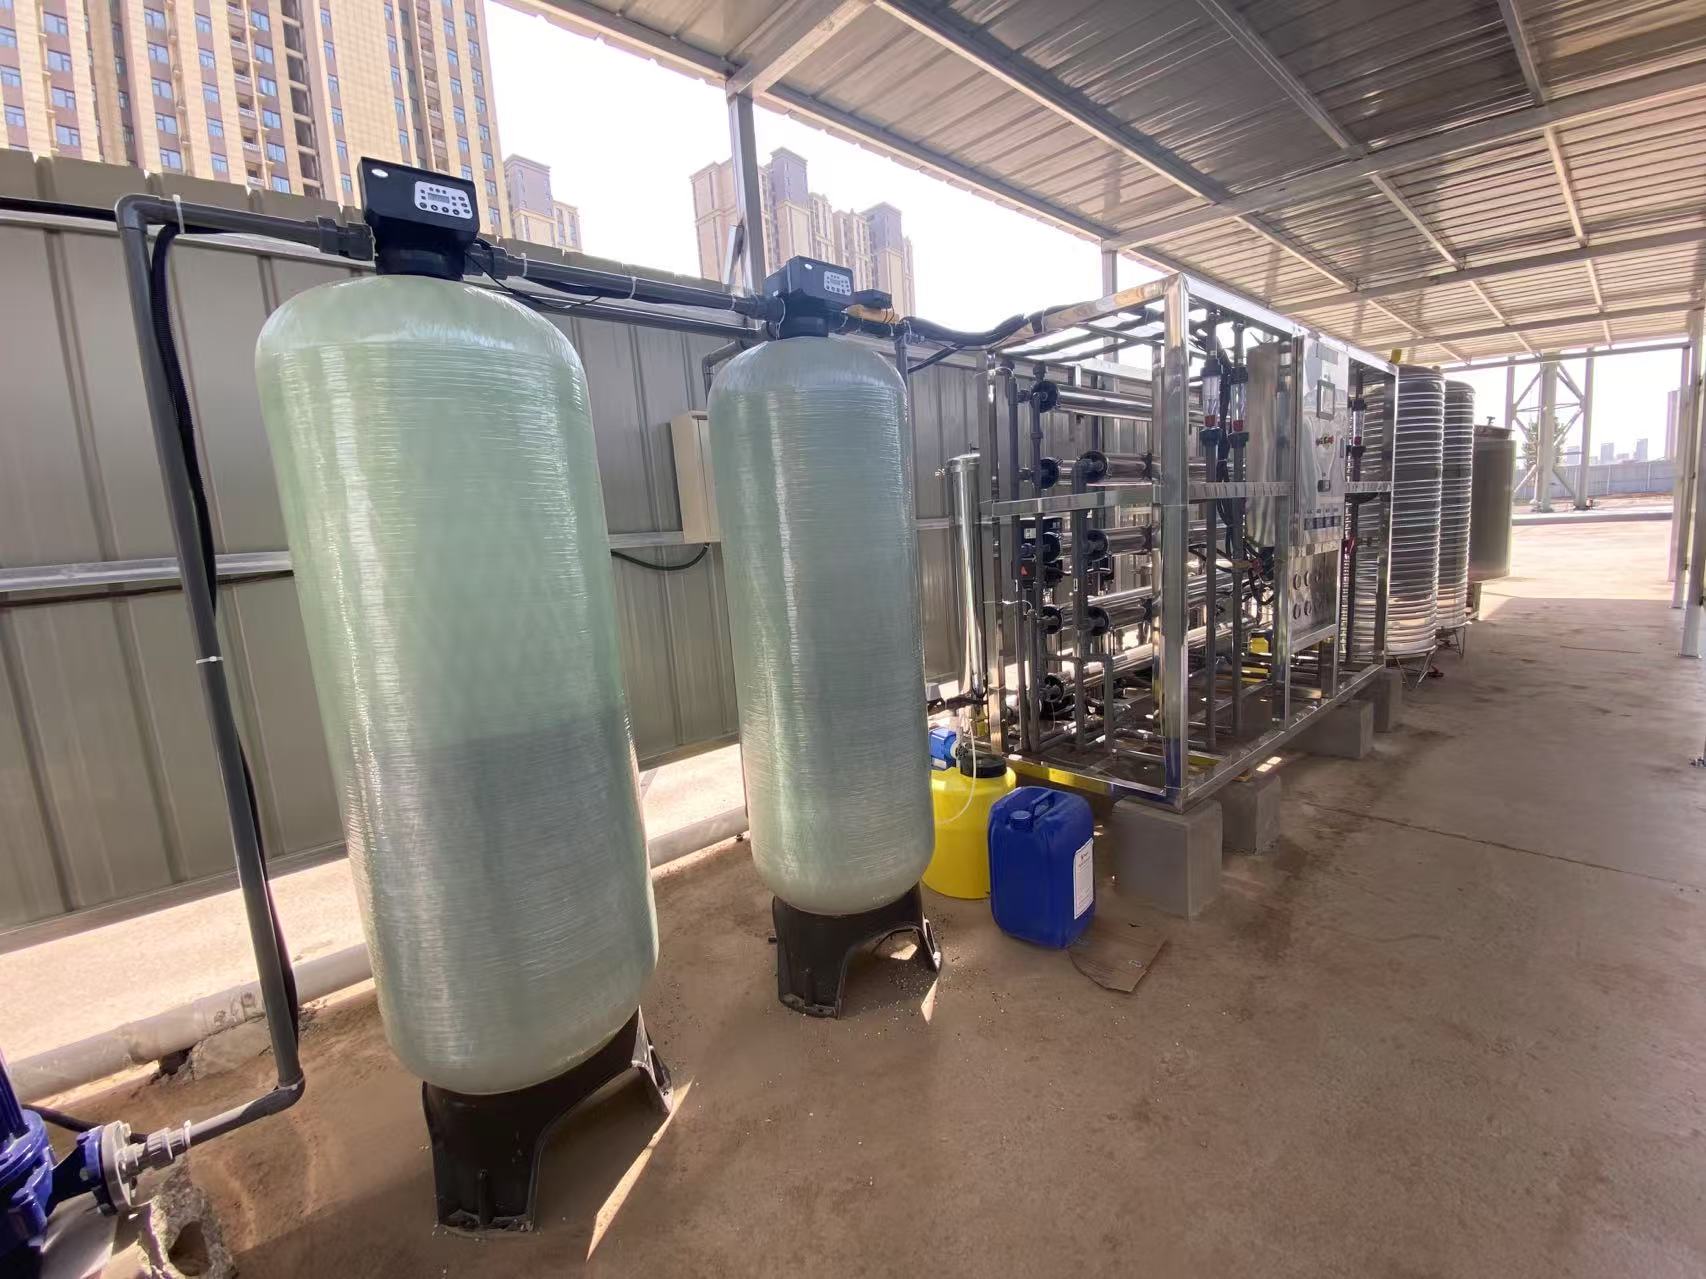


**Figure S17** The water purify system which provides purified water in the experiment. The original water source is supplied by Zhengzhou city.
